# Supplementary material for: Higher quality nutrition care process documentation predicts nutrition diagnosis improvement in the Academy of Nutrition and Dietetics breastfeeding registry study
Source: Front Nutr. 2025 Nov 17;12:1632931. doi: 10.3389/fnut.2025.1632931 (PMC12667241; doi:10.3389/fnut.2025.1632931)
Supplement: Supplementary file 1 [file Supplementary_file_1.docx]

Supplementary Material


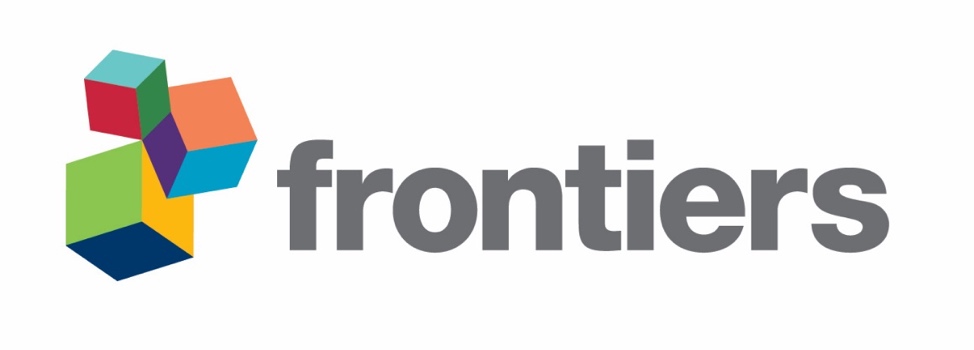


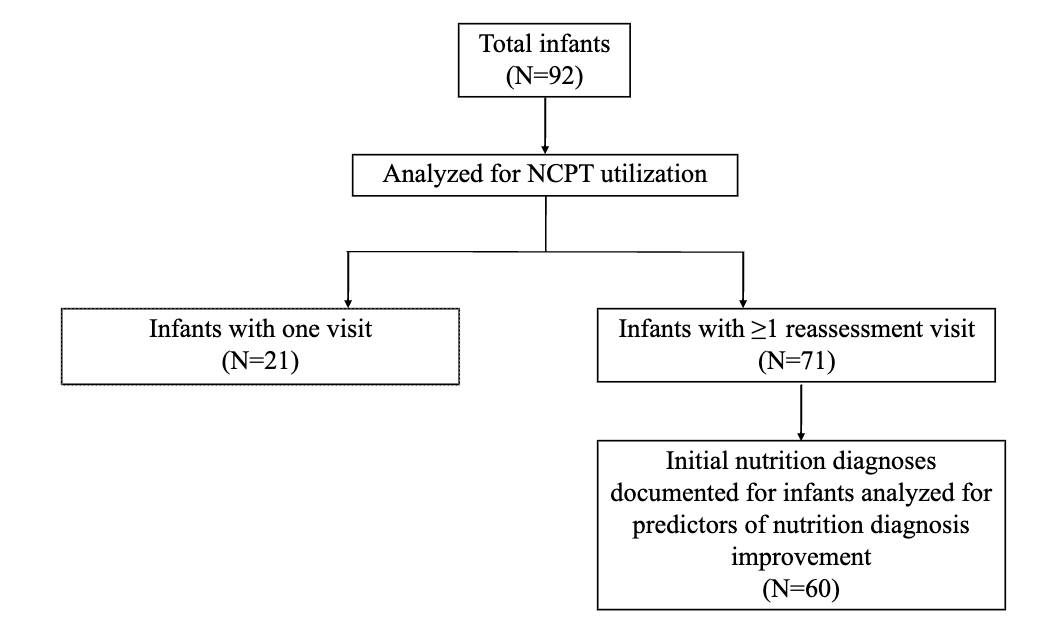

**Supplementary Figure 1.** Flow chart illustrating the process of analyzing nutrition care data documented in the Academy of Nutrition and Dietetics Health Informatics Infrastructure for infants in the Breastfeeding Registry Study (N=92). NCPT, Nutrition Care Process Terminology9

**Supplementary Table 1.** Registered Dietitian Nutritionist (RDN) and Collaborating Site Characteristics for the Breastfeeding Registry (BFR) Study.

|  | **N (%)** | | |
| --- | --- | --- | --- |
| **RDN Race** | | | |
| White or Caucasian | 9 (100) | | |
| **RDN Education Level** | | | |
| Bachelor’s Degree | 8 (89) | | |
| Master’s Degree | 1 (11) | | |
| **RDN Lactation Certification - Yes** | 6 (67) | | |
| CLC or CLE | 4 (44) | | |
| IBCLC | 2 (22) | | |
| **Facility Type** |  | | |
| Community/Public Health | 7 (78) | | |
| Neonatal Intensive Care Unit | 2 (22) | | |
| **Prior ANDHII Training – Yes** | 1 (11) | | |
| **Prior NCP/T Training - Yes** | 7 (78) | | |
| **NCP/T Utilized at Collaborating Site – Yes** | 6 (67) | | |
|  | **Median (IQR)** | **Minimum** | **Maximum** |
| **Years of RDN experience** | 2 (6) | 0.5 | 15 |
| **Years working at collaborating site** | 2 (5) | 0.5 | 15 |
| **Years working in current position** | 2 (6) | 0.5 | 15 |
| **Number of RDNs employed at collaborating site** | 3 (10) | 1 | 28 |
| **Number of RDNs with advanced degrees employed at collaborating site** | 1 (3) | 0 | 30 |
| **Number of RDNs with lactation credentials at collaborating site** | 1 (3) | 0 | 4 |

_________________________________________________________________________________

Abbreviations: CLC, Certified Lactation Counselor. CLE, Certified Lactation Educator. IBCLC, International Board-Certified Lactation Consultant. ANDHII, Academy of Nutrition and Dietetics Health Informatics Infrastructure. NCP/T, Nutrition Care Process and Terminology.


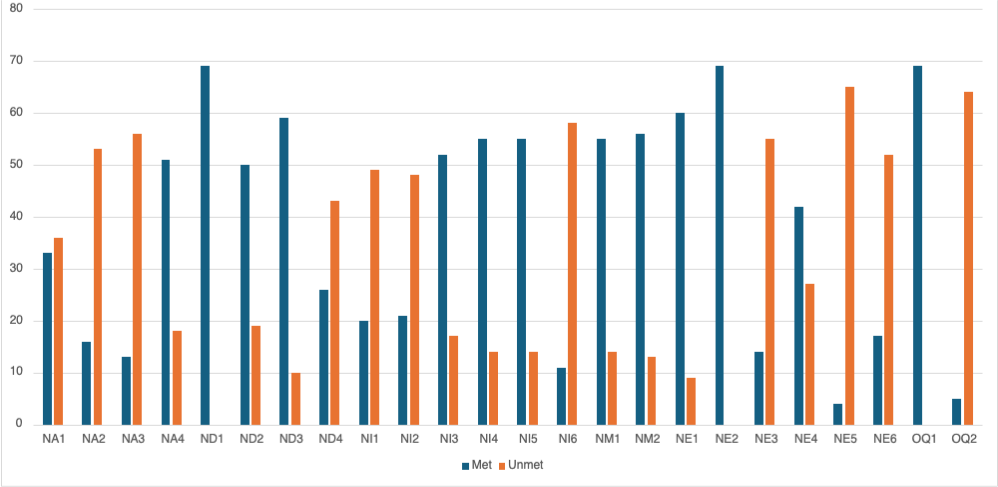

**Supplementary Figure 2.** Distribution of Nutrition Care Process Quality Evaluation and Standardization Tool (NCP-QUEST)26 indicators from the audit of nutrition care documentation (N=69) in the Breastfeeding Registry (BFR). All encounters in the BFR were documented within the Academy of Nutrition and Dietetics Health Informatics Infrastructure (ANDHII).8 This figure includes matched initial and reassessment encounters for infants with at least one documented nutrition diagnosis. Specific indicators correspond to the five NCP chain links: ND2 (evidence-diagnosis link), ND4 (diagnosis-etiology link), NI1 (etiology-intervention link), NI3 (intervention-goal link), and NE2 (diagnosis-outcomes link). NA= nutrition assessment; ND= nutrition diagnosis; NI= nutrition intervention; NM= nutrition monitoring; NE= nutrition evaluation; OQ= overall quality.

**Supplementary Table 2.** Distribution of the top five most frequently documented Nutrition Care Process Terminology (NCPT)9for infants (N=92)in the Breastfeeding Registry (BFR) Study.

|  | **Domain/ Category** | **NCPT Term** | **N (%)** |
| --- | --- | --- | --- |
| **Nutrition Assessment** | | | |
| Assessment NCPT  (N=2,229 terms) | Client History | Age | 184 (8.2) |
| Food or Nutrition-Related History | Mothers expressed breastmilk intake | 179 (8.0) |
| Client History | Gender | 163 (7.3) |
| Food or Nutrition-Related History | Exclusive breastfeeding | 145 (6.5) |
| Anthropometric Measurements | Weight | 138 (6.2) |
| Other NCPT documented | | 1420 (63.7) |
| **Nutrition Diagnosis** | | | |
| Problem NCPT  (N=180 terms) | Clinical | Breastfeeding difficulty | 56 (31.1) |
| Intake | Inadequate oral intake | 29 (16.1) |
| Clinical | Predicted breastfeeding difficulty | 18 (10) |
| Intake | Inadequate energy intake | 15 (8.3) |
| Intake | Inadequate vitamin D intake | 14 (7.8) |
| Other NCPT documented | | 48 (26.7) |
| Etiology NCPT*  (N=160 terms) | Physical-Function | Breastfeeding difficulty | 28 (17.5) |
| Knowledge | Food and nutrition related knowledge deficit | 25 (15.6) |
| Behavior | Disordered eating pattern | 14 (8.8) |
| Physiologic-Metabolic | Inadequate energy intake | 14 (8.8) |
| Physiologic-Metabolic | Increased nutrient needs | 13 (7.2) |
| Physical-Function | Predicted breastfeeding difficulty | 13 (7.2) |
| Other NCPT documented | | 53 (33.1) |
| Signs/Symptoms NCPT  (N=292 terms) | Food or Nutrition-Related History | Energy estimated intake from oral nutrition in 24 hours | 50 (17.1) |
| Food or Nutrition-Related History | Breastmilk feeding attempts in 24 hours | 35 (12) |
| Food or Nutrition-Related History | Adequacy of infant formula intake | 22 (7.5) |
| Food or Nutrition-Related History | Breastfeeding difficulties | 19 (6.5) |
| Food or Nutrition-Related History | Difficulty latching onto breast for feeding | 15 (5.1) |
| Other NCPT documented | | 151 (51.7) |
| **Nutrition Intervention** | | | |
| Intervention NCPT  (N=237 terms) | Food and/or Nutrient Delivery | Modify breastfeeding attempts | 32 (13.5) |
| Coordination of Nutrition Care | Collaboration by nutrition professional with other providers | 22 (9.3) |
| Coordination of Nutrition Care | Referral by nutrition professional to community agencies and programs | 21 (8.9) |
| Nutrition Education | Education on nutrition's influence on health | 19 (8) |
| Food and/or Nutrient Delivery | Evaluation of breastfeeding | 14 (5.9) |
| Other NCPT documented | | 129 (54.4) |
| **Nutrition Monitoring and Evaluation** | | | |
| Reassessment NCPT  (N=227 terms) | Food or Nutrition-Related History | Breastmilk feeding attempts in 24 hours | 31 (13.7) |
| Food or Nutrition-Related History | Difficulty latching onto breast for feeding | 19 (8.4) |
| Food or Nutrition-Related History | Energy estimated intake from oral nutrition in 24 hours | 15 (6.6) |
| Food or Nutrition-Related History | Inadequate flow of breastmilk | 14 (6.2) |
| Food or Nutrition-Related History | Breastfeeding difficulties | 10 (4.4) |
| Food or Nutrition-Related History | Infant formula intake | 10 (4.4) |
| Comparative Standards | Vitamin D needs | 10 (4.4) |
| Other NCPT documented | | 118 (52.0) |

Nutrition care encounter documentation was analyzed from the Academy of Nutrition and Dietetics Health Informatics Infrastructure (ANDHII).8 This table reflects NCPT from a total of 197 initial and reassessment encounters, with RDNs documenting multiple terms across Nutrition Care Process9 steps. The five most frequently documented NCPT terms are listed; in case of a tie, terms appear in alphabetical order. *There are no nutrition etiology NCPT terms. Nutrition etiologies were free texted in ANDHII.
